# Supplementary material
Source: PubMed Central journal article supplement (PMC5624806)

## Supplementary Online Content

Raof M, Dumitra S, Ituarte PHG, et al. Development and validation of a prognostic score for intrahepatic cholangiocarcinoma. *JAMA Surg*. Published online March 15, 2017. doi:10.1001/jamasurg.2017.0117

**eTable 1.** *ICD-9-CM* Codes Used to Calculate Subgroups of Complications

**eTable 2.** Postoperative Morbidity and Mortality of the Study Population and ISS vs ELM Subgroups

**eTable 3.** Predictors of Morbidity or Mortality in ELM Tumors (n=136)

**eTable 4.** Comparison of Predictor Variables in Training and Validation Set

**eFigure.** Baseline Kaplan-Meier Overall Survival Estimate of California Cancer Registry (CCR) Training Set and Non-Californian SEER Registry Validation Set

This supplementary material has been provided by the authors to give readers additional information about their work.

**eTable 1. ICD-9-CM Codes Used to Calculate Subgroups of Complications**

| <b>SURGICAL COMPLICATIONS</b> |        |        |                                                                                                                                                                              |
|-------------------------------|--------|--------|------------------------------------------------------------------------------------------------------------------------------------------------------------------------------|
| Complication Type             | Code   | Number | Description                                                                                                                                                                  |
| Anastomotic or bile leak      | ICD-9D | 997.4  | Digestive system complications not elsewhere classified, including complications of intestinal (internal) anastomosis and bypass, not elsewhere classified                   |
|                               | ICD-9D | 997.49 | Other digestive system complications, including postprocedural bile duct leak, intestinal obstruction due to a procedure, peritonitis due to bile leak after cholecystectomy |
|                               |        |        |                                                                                                                                                                              |
| Hemorrhagic                   | ICD-9D | 998.1  | Hemorrhage or hematoma or seroma complicating a procedure                                                                                                                    |
|                               | ICD-9D | 998.11 | Hemorrhage complicating a procedure                                                                                                                                          |
|                               | ICD-9D | 998.12 | Hematoma complicating a procedure                                                                                                                                            |
|                               | ICD-9D | 998.13 | Seroma complicating a procedure                                                                                                                                              |
|                               |        | 998.2  | Accidental puncture or laceration during a procedure                                                                                                                         |
|                               | ICD-9D | E870.0 | Accidental cut, puncture, perforation or hemorrhage during surgical operation                                                                                                |
|                               | ICD-9P | 39.98  | Control of hemorrhage, not otherwise specified                                                                                                                               |
|                               | ICD-9P | 99.04  | Transfusion of packed cells                                                                                                                                                  |
|                               |        |        |                                                                                                                                                                              |
| Wound-related                 | ICD-9D | 998.3  | Disruption of wound                                                                                                                                                          |
|                               | ICD-9D | 998.31 | Disruption of internal operation (surgical) wound                                                                                                                            |
|                               | ICD-9D | 998.32 | Disruption of external operation (surgical) wound                                                                                                                            |
|                               | ICD-9D | 998.5  | Postoperative infection                                                                                                                                                      |
|                               | ICD-9D | 998.51 | Infected postoperative seroma                                                                                                                                                |
|                               | ICD-9D | 998.59 | Other postoperative infection                                                                                                                                                |
|                               | ICD-9D | 998.83 | Non-healing surgical wound                                                                                                                                                   |
|                               | ICD-9P | 86.04  | Other incision with drainage of skin and subcutaneous tissue                                                                                                                 |
|                               | ICD-9P | 86.22  | Excisional debridement of wound, infection, or burn                                                                                                                          |
|                               |        |        |                                                                                                                                                                              |
| Intra-abdominal abscess       | ICD-9D | 567.22 | Peritoneal abscess                                                                                                                                                           |
|                               | ICD-9P | 54.91  | Percutaneous abdominal drainage                                                                                                                                              |
|                               |        |        |                                                                                                                                                                              |
| Sepsis                        | ICD-9D | 038.9  | Unspecified septicemia                                                                                                                                                       |
|                               | ICD-9D | 785.52 | Septic shock                                                                                                                                                                 |
|                               | ICD-9D | 790.7  | Bacteremia                                                                                                                                                                   |
|                               | ICD-9D | 995.9  | Systemic inflammatory response syndrome (SIRS)                                                                                                                               |
|                               | ICD-9D | 995.91 | Sepsis                                                                                                                                                                       |
|                               | ICD-9D | 995.92 | Severe sepsis                                                                                                                                                                |
|                               | ICD-9D | 998.0  | Postoperative shock                                                                                                                                                          |

| <b>MEDICAL COMPLICATIONS</b> |        |                |                                                                                                                      |
|------------------------------|--------|----------------|----------------------------------------------------------------------------------------------------------------------|
| Complication Type            | Code   | Number         | Description                                                                                                          |
| Respiratory                  | ICD-9D | 465            | Acute upper respiratory infections of multiple or unspecified sites                                                  |
|                              | ICD-9D | 465.9          | Acute upper respiratory infections of multiple or unspecified sites                                                  |
|                              | ICD-9D | 482            | Other bacterial pneumonia                                                                                            |
|                              | ICD-9D | 482.0          | Pneumonia due to <i>Klebsiella pneumoniae</i>                                                                        |
|                              | ICD-9D | 482.1          | Pneumonia due to <i>Pseudomonas</i>                                                                                  |
|                              | ICD-9D | 482.2          | Pneumonia due to <i>Hemophilus influenzae</i>                                                                        |
|                              | ICD-9D | 482.41         | Methicillin susceptible pneumonia due to <i>Staphylococcus aureus</i>                                                |
|                              | ICD-9D | 482.82         | Pneumonia due to other specified bacteria - <i>Escherichia coli</i>                                                  |
|                              | ICD-9D | 482.83         | Pneumonia due to other specified bacteria - Other gram-negative bacteria                                             |
|                              | ICD-9D | 486            | Pneumonia, organism unspecified                                                                                      |
|                              | ICD-9D | 511.9          | Pleurisy - Unspecified pleural effusion                                                                              |
|                              | ICD-9D | 518            | Other diseases of lung                                                                                               |
|                              | ICD-9D | 518.0          | Pulmonary collapse                                                                                                   |
|                              | ICD-9D | 518.4          | Acute edema of lung, unspecified                                                                                     |
|                              | ICD-9D | 518.5          | Pulmonary insufficiency following trauma and surgery                                                                 |
|                              | ICD-9D | 518.81         | Acute respiratory failure                                                                                            |
|                              | ICD-9D | 518.82         | Other pulmonary insufficiency, not elsewhere classified                                                              |
|                              | ICD-9D | 518.84         | Acute and chronic respiratory failure                                                                                |
|                              | ICD-9D | 799.1          | Other ill-defined and unknown causes of morbidity and mortality; respiratory arrest                                  |
|                              | ICD-9D | 997.3          | Complications affecting specified body systems, not elsewhere classified; respiratory complications from a procedure |
| Cerebrovascular accidents    | ICD-9D | 997.0          | Complications affecting specified body systems, not elsewhere classified - Nervous system complications              |
|                              | ICD-9D | 997.01         | Central nervous system complication (anoxic brain damage; cerebral hypoxia)                                          |
|                              | ICD-9D | 997.02         | Iatrogenic cerebrovascular infarction or hemorrhage                                                                  |
|                              | ICD-9D | 997.09         | Other nervous system complications                                                                                   |
| Renal Insufficiency          | ICD-9D | 584.5          | Acute renal failure - With lesion of tubular necrosis                                                                |
|                              |        | 584.9          | Acute renal failure, unspecified                                                                                     |
| Cardiovascular               | ICD-9D | 410.1 to 410.9 | Acute myocardial infarction - Of other anterior wall; Acute myocardial infarction - Unspecified site                 |

|                                                |        |        |                                                                                                                |
|------------------------------------------------|--------|--------|----------------------------------------------------------------------------------------------------------------|
|                                                | ICD-9D | 411.89 | Acute coronary occlusion without myocardial infarction-other (coronary insufficiency; subendocardial ischemia) |
|                                                | ICD-9D | 997.1  | Complications affecting specified body systems, not elsewhere classified - Cardiac complications               |
|                                                | ICD-9D | 998.0  | Postoperative shock not elsewhere classified                                                                   |
|                                                | ICD-9D | 998.01 | Postoperative shock, cardiogenic                                                                               |
|                                                | ICD-9D | 998.02 | Postoperative shock, septic                                                                                    |
|                                                | ICD-9D | 998.09 | Postoperative shock, other                                                                                     |
|                                                |        |        |                                                                                                                |
| Urinary tract infection                        | ICD-9D | 997.5  | Urinary complications (as due to procedure)                                                                    |
|                                                |        |        |                                                                                                                |
| Portal/renal thrombosis & deep vein thrombosis | ICD-9D | 444.22 | Embolism and thrombosis of arteries of the extremities                                                         |
|                                                | ICD-9D | 452    | Portal vein thrombosis                                                                                         |
|                                                | ICD-9D | 453.3  | Other venous embolism and thrombosis of renal vein                                                             |
|                                                | ICD-9D | 453.4  | Acute venous embolism and thrombosis of deep vessels of lower extremity                                        |
|                                                | ICD-9D | 453.40 | Acute venous embolism and thrombosis of unspecified deep vessels of lower extremity                            |
|                                                | ICD-9D | 453.41 | Acute venous embolism and thrombosis of deep vessels of proximal lower extremity                               |
|                                                | ICD-9D | 453.42 | Acute venous embolism and thrombosis of deep vessels of distal lower extremity                                 |
|                                                | ICD-9D | 453.6  | Venous embolism and thrombosis of superficial vessels of lower extremity                                       |
|                                                | ICD-9D | 453.8  | Acute venous embolism and thrombosis of other specified veins                                                  |
|                                                | ICD-9D | 453.82 | Acute venous embolism and thrombosis of deep veins of upper extremity                                          |
|                                                | ICD-9D | 453.84 | Acute venous embolism and thrombosis of axillary veins                                                         |
|                                                | ICD-9D | 453.85 | Acute venous embolism and thrombosis of subclavian veins                                                       |
|                                                | ICD-9D | 453.86 | Acute venous embolism and thrombosis of internal jugular veins                                                 |
|                                                | ICD-9D | 557.0  | Acute vascular insufficiency of intestine                                                                      |
|                                                |        |        |                                                                                                                |
| Pulmonary Embolism                             | ICD-9D | 415.1  | Pulmonary embolism and infarction                                                                              |
|                                                | ICD-9D | 415.11 | Iatrogenic pulmonary embolism and infarction                                                                   |

ICD-9D: Diagnosis code; ICD-9P : Procedure code

**eTable 2. Postoperative Morbidity and Mortality of the Study Population and ISS vs ELM Subgroups**

|                        |                          | All        | ISS        | ELM        |                |
|------------------------|--------------------------|------------|------------|------------|----------------|
|                        |                          | N= 275     | N= 139     | N= 136     |                |
|                        |                          | N (%)      | N (%)      | N (%)      | <i>P</i> Value |
| Mortality 90-day       | No                       | 259 (94.2) | 129 (92.8) | 130 (95.6) | .32            |
|                        | Yes                      | 16 (5.8)   | 10 (7.2)   | 6 (4.4)    |                |
| Complications (Any)    | No                       | 190 (69.1) | 91 (65.5)  | 99 (72.8)  | .19            |
|                        | Yes                      | 85 (30.9)  | 48 (34.5)  | 37 (27.2)  |                |
| Surgical Complications |                          |            |            |            |                |
|                        | Bile/ anastomotic leak   | 17 (6.2)   | 8 (5.8)    | 9 (6.6)    | .77            |
|                        | Hemorrhagic/ Transfusion | 43 (15.6)  | 25 (18)    | 18 (13.2)  | .28            |
|                        | Wound                    | 11 (4)     | 4 (2.9)    | 7 (5.1)    | .34            |
|                        | Abscess/Sepsis           | 17 (6.2)   | 8 (5.8)    | 9 (6.6)    | .77            |
| Medical Complications  |                          |            |            |            |                |
|                        | Respiratory              | 32 (11.6)  | 15 (10.8)  | 17 (12.5)  | .66            |
|                        | Neurologic/ Stroke       | 1 (0.4)    | 1 (0.7)    | 0 (0)      | .32            |
|                        | Renal                    | 8 (2.9)    | 3 (2.2)    | 5 (3.7)    | .45            |
|                        | Cardiovascular           | 7 (2.6)    | 4 (2.9)    | 3 (2.2)    | .72            |
|                        | UTI                      | 3 (1.1)    | 1 (0.7)    | 2 (1.5)    | .55            |
|                        | DVT/ PE                  | 5 (1.8)    | 1 (0.7)    | 4 (2.9)    | .15            |

UTI - Urinary Tract Infection, DVT - Deep venous thrombosis, PE - Pulmonary Embolism

**eTable 3. Predictors of Morbidity or Mortality in ELM Tumors (n=136)**

|                                        | Morbidity or Mortality |            | Univariate       | <i>P</i> Value | Multivariate  | <i>P</i> Value |
|----------------------------------------|------------------------|------------|------------------|----------------|---------------|----------------|
|                                        | No (94)                | Yes (42)   | OR (95% CI)      |                | OR (95% CI)   |                |
| Age - Median (IQR)                     | 65 (54-73)             | 65 (59-69) |                  | .68            |               |                |
| Race/Ethnicity - N(%)                  |                        |            |                  |                |               |                |
| Non-Hispanic White                     | 55 (58.5)              | 20 (47.6)  | ( reference )    |                |               |                |
| Asian/ Pacific-islander                | 20 (21.3)              | 10 (23.8)  | 1.37 (0.55-3.43) | .50            |               |                |
| Hispanic White                         | 14 (14.9)              | 9 (21.4)   | 1.77 (0.66-4.72) | .26            |               |                |
| Black                                  | 4 (4.3)                | 1 (2.4)    | 0.69 (0.07-6.52) | .74            |               |                |
| Other                                  | 1 (1.1)                | 2 (4.8)    | 5.5 (0.47-64.01) | .17            |               |                |
| Sex - N(%)                             |                        |            |                  |                |               |                |
| Male                                   | 33 (35.1)              | 22 (52.4)  | ( reference )    |                |               |                |
| Female                                 | 61 (64.9)              | 20 (47.6)  | 0.49 (0.23-1.03) | .06            |               |                |
| Year of Diagnosis - N(%)               |                        |            |                  |                |               |                |
| 2004-06                                | 36 (38.3)              | 10 (23.8)  | ( reference )    |                |               |                |
| 2007-09                                | 31 (33)                | 14 (33.3)  | 1.63 (0.63-4.17) | .31            |               |                |
| 2010-12                                | 27 (28.7)              | 18 (42.9)  | 2.4 (0.95-6.02)  | .06            |               |                |
| Insurance - N(%)                       |                        |            |                  |                |               |                |
| Government                             | 54 (57.4)              | 22 (52.4)  | ( reference )    |                |               |                |
| Private                                | 40 (42.5)              | 20 (47.6)  | 1.23 (0.59-2.55) | .58            |               |                |
| NCI-designated Cancer Center - N(%)    |                        |            |                  |                |               |                |
| No                                     | 72 (76.6)              | 27 (64.3)  | ( reference )    |                |               |                |
| Yes                                    | 22 (23.4)              | 15 (35.7)  | 1.82 (0.82-4.01) | .14            |               |                |
| Charlson-Deyo Comorbidity Score - N(%) |                        |            |                  |                |               |                |
| 0                                      | 23 (24.5)              | 5 (11.9)   | 1 [Reference]    |                | 1 [Reference] |                |

|                                                                                         |           |               |                   |      |                   |      |
|-----------------------------------------------------------------------------------------|-----------|---------------|-------------------|------|-------------------|------|
| 1                                                                                       | 51 (54.3) | 18 (42.9)     | 1.62 (0.54-4.91)  | .39  | -                 |      |
| 2                                                                                       | 14 (14.9) | 13 (30.9)     | 4.27 (1.25-14.57) | .02  | 3.02 (1.12-8.17)  | .03  |
| 3+                                                                                      | 6 (6.4)   | 6 (14.3)      | 4.6 (1.04-20.38)  | .045 | 5.25 (1.32-20.9)  | .02  |
| Tumor Size - Median (IQR)                                                               |           | 7.9 (5.5-9.5) | 7.9 (4.8-10.5)    |      | .76               |      |
| Extent of Surgery - N(%)                                                                |           |               |                   |      |                   |      |
| Minor                                                                                   | 42 (45.2) | 10 (23.8)     | 1 [Reference]     |      | 1 [Reference]     |      |
| Major                                                                                   | 51 (54.8) | 32 (76.2)     | 2.63 (1.16-5.98)  | .02  | 3.93 (1.50-10.30) | .005 |
| Portal Lymphadenectomy - N(%)                                                           |           |               |                   |      |                   |      |
| No                                                                                      | 46 (48.9) | 22 (52.4)     | 1 [Reference]     |      |                   |      |
| Yes                                                                                     | 48 (51.1) | 20 (47.6)     | 0.87 (0.42-1.80)  | .71  |                   |      |
| Vascular Invasion- N(%)                                                                 |           |               |                   |      |                   |      |
| No                                                                                      | 69 (73.4) | 30 (73.2)     | 1 [Reference]     |      |                   |      |
| Yes                                                                                     | 25 (26.6) | 11 (26.8)     | 1.01 (0.44-2.32)  | .98  |                   |      |
| Contiguous organ involvement - N(%)                                                     |           |               |                   |      |                   |      |
| No                                                                                      | 78 (83)   | 30 (73.2)     | 1 [Reference]     |      |                   |      |
| Yes                                                                                     | 16 (17)   | 11 (26.8)     | 1.79 (0.74-4.29)  | .19  |                   |      |
| Multifocal - N(%)                                                                       |           |               |                   |      |                   |      |
| No                                                                                      | 58 (61.7) | 26 (61.9)     | 1 [Reference]     |      |                   |      |
| Yes                                                                                     | 36 (38.3) | 16 (38.1)     | 0.99 (0.47-2.10)  | .98  |                   |      |
| 95% CI - 95% Confidence Intervals                                                       |           |               |                   |      |                   |      |
| Minor, Less than hemi-hepatectomy; Major, Hemi-hepatectomy or Extended hemi-hepatectomy |           |               |                   |      |                   |      |

**eTable 4. Comparison of Predictor Variables in Training and Validation Set**

|                        |   | CCR<br>Training - n(%) | Non-California SEER<br>Validation - n(%) | <i>P</i> Value |
|------------------------|---|------------------------|------------------------------------------|----------------|
| Multifocal             | N | 169 (81.6)             | 207 (79.3)                               | .53            |
|                        | Y | 38 (18.4)              | 54 (20.7)                                |                |
| Extrahepatic Extension | N | 185 (89.4)             | 247 (94.6)                               | .03            |
|                        | Y | 22 (10.6)              | 14 (5.4)                                 |                |
| Grade                  | N | 147 (71)               | 181 (69.3)                               | .70            |
|                        | Y | 60 (29)                | 80 (30.6)                                |                |
| Node Positive          | N | 163 (78.7)             | 216 (82.8)                               | .27            |
|                        | Y | 44 (21.3)              | 45 (17.2)                                |                |
| Age 60+ years          | N | 83 (40.1)              | 104 (39.8)                               | .96            |
|                        | Y | 124 (59.9)             | 157 (60.2)                               |                |
| <b>Total</b>           |   | <b>207 (100)</b>       | <b>261 (100)</b>                         |                |



**eFigure. Baseline Kaplan-Meier Overall Survival Estimate of California Cancer Registry (CCR) Training Set and Non-Californian SEER Registry Validation Set**

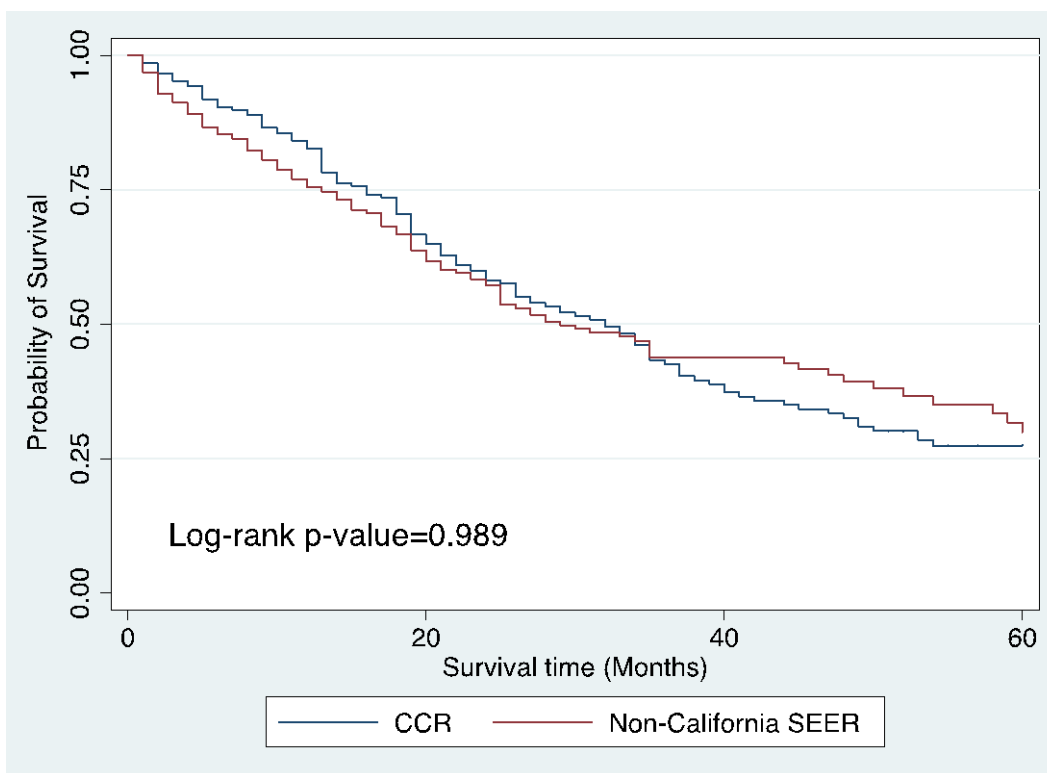

Supplement: NIHMS905503-supplement-eTable_1-4__eFigure.pdf [file NIHMS905503-supplement-eTable_1-4__eFigure.pdf]
